# Supplementary material for: Insecticide Resistance in the Disease Vector Culex pipiens in Morocco: Intensity, Mechanisms, and Contribution in Insecticide Resistance Management
Source: Hindawi journal article supplement (doi:10.1155/2022/5576317), 2022-04-28
Supplement: f1 [file 5576317.f1.pdf]

Vector control  
by chemical insecticides

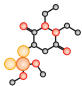

Malathion 5%

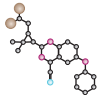

Deltamethrine 0.05%

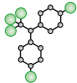

DDT 4%

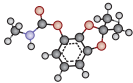

Bendiocarb 0.1%

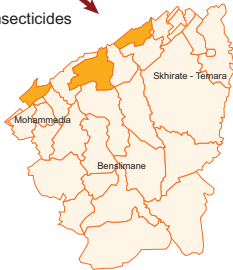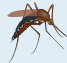

**Mohammedia:**

Level 3 → IRM  
HRI To PY & CX  
CMRM

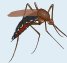

**Benslimane:**

Level 3 → IRM  
MRI To PY & HRI To CX  
PMRM

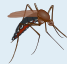

**Skhirate:**

Level 2 → IRM  
MRI To PY & CX  
CMRM
